# Supplementary material
Source: PubMed Central journal article supplement (PMC419531)
Supplement: pnas_101_21_7913__1.pdf [file pnas_101_21_7913__1.pdf]

**Table 1.** Data collection and refinement statistics

|                                                         | PqqC/PQQ                         |
|---------------------------------------------------------|----------------------------------|
| Space group                                             | P2 <sub>1</sub> 2 <sub>1</sub> 2 |
| Wavelength, Å                                           | 0.984                            |
| Resolution, Å                                           | 70-2.3                           |
| Reflections (observed)                                  | 84,013                           |
| Reflections (unique)                                    | 24,745                           |
| Completeness, % (last shell)                            | 93.4 (89.1)                      |
| <i>I</i> /σ (last shell)                                | 8.2 (1.7)                        |
| <i>R</i> <sub>merge</sub> <sup>*</sup> , % (last shell) | 16.2 (42.3)                      |
| Resolution range, Å                                     | 70-2.3                           |
| Reflections (total)                                     | 24,745                           |
| <i>R</i> <sub>cryst</sub> <sup>†</sup> , %              | 20.51                            |
| <i>R</i> <sub>free</sub> <sup>‡</sup> , %               | 24.83                            |
| Protein atoms                                           | 4,155                            |
| Water molecules                                         | 119                              |
| rmsd <sup>§</sup> angles, °                             | 1.64                             |
| rmsd <sup>§</sup> bonds, Å                              | 0.017                            |

\*  $R_{\text{merge}} = \sum |I - \langle I \rangle| / \sum I$ , where *I* is the observed intensity and  $\langle I \rangle$  is the average intensity from multiple observations of symmetry-related reflections. Values in parentheses correspond to the highest resolution shell.

†  $R_{\text{cryst}} = \sum |(F_{\text{obs}}) - (F_{\text{calc}})| / \sum (F_{\text{obs}})$ .

‡ *R*<sub>free</sub> = same as *R*<sub>cryst</sub> but comprises a test set (5% of total reflections), which was not used in model refinement.

§ rmsd, rms deviation.
